# Supplementary material for: Overestimation of alternative splicing caused by variable probe characteristics in exon arrays
Source: Oxford University Press journal article supplement (doi:10.1093/nar/gkp508), 2009-06-15
Supplement: gkp508_Supplementary_Data.zip [file gkp508_Supplementary_Data.zip]

Archive with 1 entries (1 files):
- nar-00453-met-k-2009-File012.pdf
