# Supplementary material for: Overestimation of alternative splicing caused by variable probe characteristics in exon arrays
Source: Oxford University Press journal article supplement (doi:10.1093/nar/gkp508), 2009-06-15
Supplement: gkp508_Supplementary_Data.zip [file gkp508_Supplementary_Data.zip › nar-00453-met-k-2009-File012.pdf]

## **Supplementary data**

Dimos Gaidatzis\*, Kirsten Jacobeit , Edward J Oakeley and Michael B Stadler\*

Friedrich Miescher Institute for Biomedical Research, Novartis Research Foundation, Maulbeerestrasse 66, CH-4058 Basel.

Email: Dimos Gaidatzis\*- d.gaidatzis@fmi.ch; Kirsten Jacobeit - kirsten.hirschfeld@fmi.ch; Edward J Oakeley - edward.oakeley@fmi.ch; Michael B Stadler\*- michael.stadler@fmi.ch;

\* Corresponding author

## **Figures**

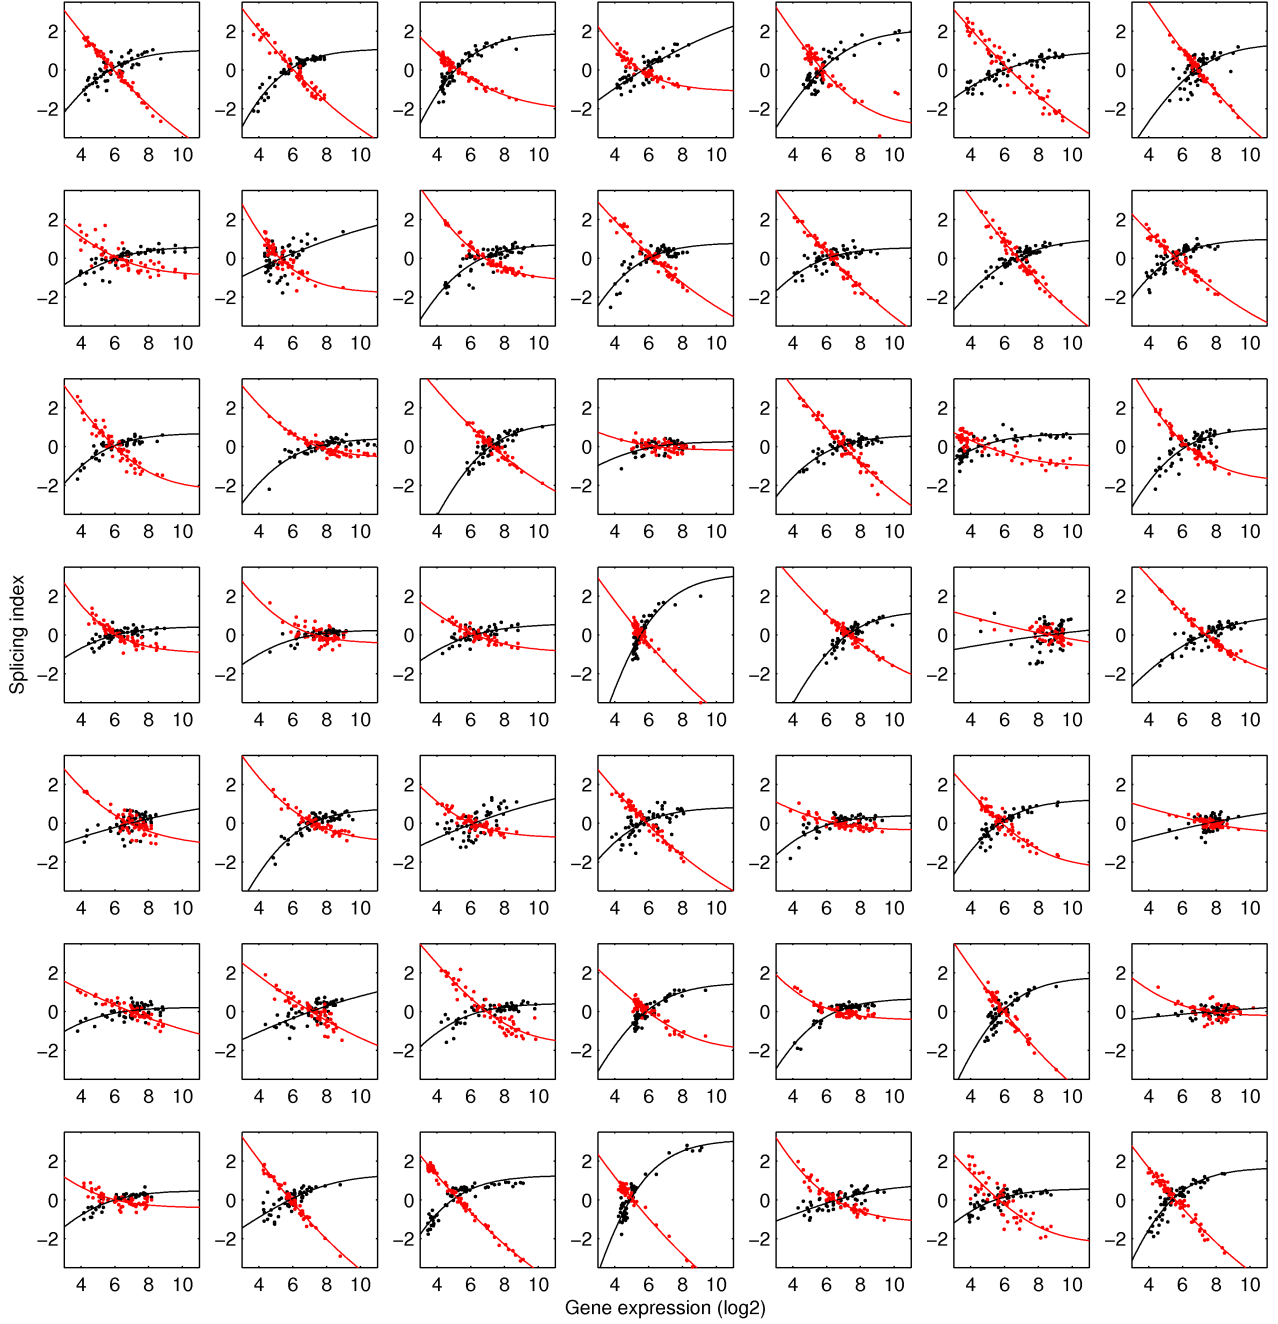

Figure 1: Non-linear probeset behavior. The x-axis represents the expression of the gene, whereas the y-axis represents the splicing index of the probeset. From a dataset of 57 lymphoblastoid cell line samples (triplicates), 49 genes were randomly selected from all differentially expressed genes ( $expression_{max} - expression_{min} > 4$ ). For each selected gene the behavior of the highest (black) and the lowest (red) responding probeset is depicted together with the line of best fit from the non-linear model.
